# Supplementary material
Source: PubMed Central journal article supplement (PMC2914493)

## Supporting Information

### **Biological Assessment of Triazine Dendrimers as Candidate Platforms for Nanomedicine: Toxicological Profiles, Solution Behavior, Biodistribution, and Drug Release and Efficacy in a PEGylated, Paclitaxel Construct**

Su-Tang Lo,<sup>†</sup> Stephan Stern,<sup>‡</sup> Jeffrey D. Clogston,<sup>‡</sup> Jiwen Zheng,<sup>‡</sup> Pavan P. Adisheshaiah,<sup>‡</sup> Marina Dobrovolskaia,<sup>‡</sup> Jongdoo Lim,<sup>‡</sup> Anil Patri,<sup>‡</sup> \* Xiankai Sun,<sup>†</sup>,\* Eric E. Simanek<sup>‡</sup>,\*

*<sup>†</sup>Department of Radiology, University of Texas Southwestern Medical Center, Dallas, Texas 75390*

*<sup>‡</sup>Department of Chemistry, Texas A&M University, College Station, Texas 77843-3255*

*<sup>‡</sup>Nanotechnology Characterization Laboratory, Advanced Technology Program, SAIC-Frederick Inc., NCI-Frederick, Frederick, MD 21702*

#### **Table of Contents**

|                                      |         |
|--------------------------------------|---------|
| Size and Zeta Potential Measurements | page S2 |
| Cell Micrographs                     | page S3 |
| Caspase Assay                        | page S3 |

**Figure S1.** The average volume distribution plots for dendrimer **1** is water (blue), 10mM NaCl (red), PBS (green), and saline (black) at 2mg/mL.

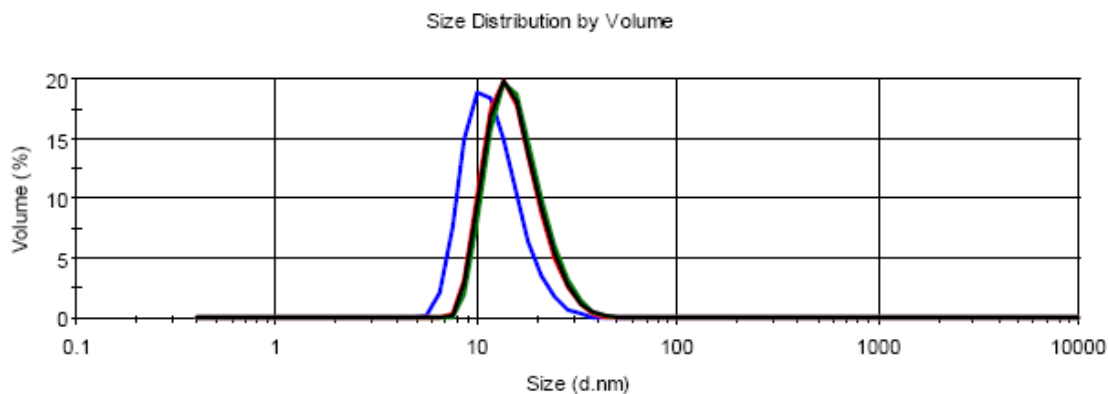

**Figure S2.** Summary of the hydrodynamic size of **1** in different solvents.

| Solvent    | $\eta$ , cP | Z-Avg, nm  | Pdl           | Int-Peak, nm | %Int       | Vol-Peak, nm | %Vol    |
|------------|-------------|------------|---------------|--------------|------------|--------------|---------|
| Water      | 0.8872      | 15.6 (0.3) | 0.173 (0.009) | 16.9 (0.3)   | 97.2 (0.5) | 12.4 (0.4)   | 100 (0) |
| 10 mM NaCl | 0.8894      | 18.5 (0.4) | 0.098 (0.006) | 20.5 (0.4)   | 100 (0)    | 15.6 (0.4)   | 100 (0) |
| PBS        | 0.8941      | 19.4 (0.5) | 0.105 (0.007) | 21.6 (0.6)   | 100 (0)    | 16.3 (0.3)   | 100 (0) |
| Saline     | 0.9025      | 18.9 (0.3) | 0.101 (0.010) | 21.0 (0.4)   | 100 (0)    | 15.8 (0.4)   | 100 (0) |

**Figure S3.** The average zeta potential for **1** in 10 mM NaCl measured on a Malvern Zetasizer Nano SZ instrument at 25°C with an applied voltage of 120 V.

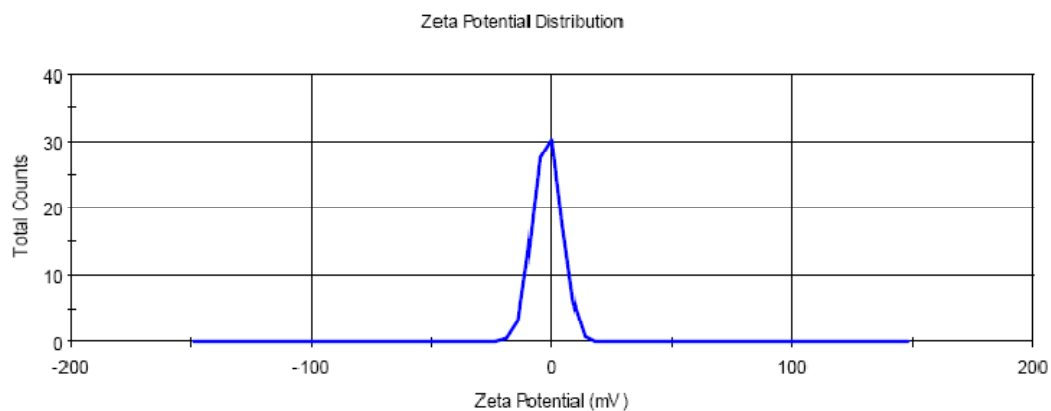

**Figure S4.** LS174T Morphology. Human colon carcinoma cells were treated with **1** and Taxol at 300  $\mu$ M paclitaxel equivalent for 24h. Morphology was assessed by phase contrast light microscopy at 200x magnification.

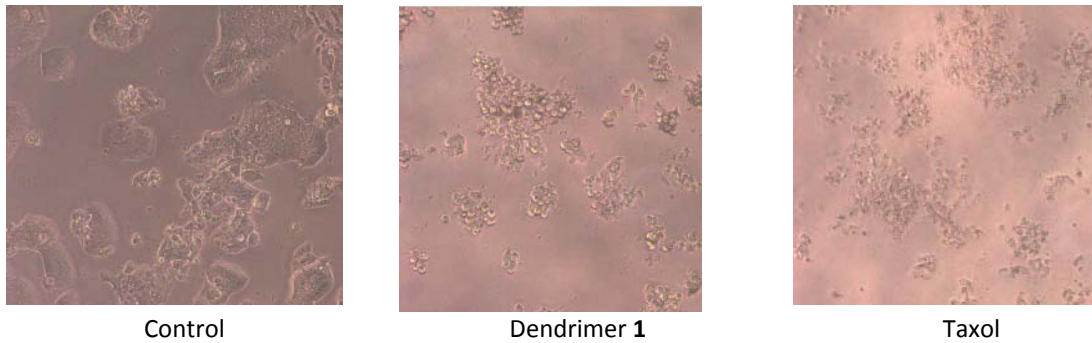

**Figure S5.** The effect of **1** and Taxol on LS174T caspase activity. Cells were treated for 24h (A) and 48h (B) with  $3 \times 10^{-7}$  to 300  $\mu$ M paclitaxel equivalent concentration of **1** (blue) and Taxol (purple) or control media. The positive control was 10mM acetaminophen. The negative control was media. Data are represented as %negative media control caspase 3 activity. Bars correspond to the mean + SE of 3 individual samples. \*P < 0.05, significantly different from negative control by ANOVA, with post hoc testing by Dunnett's t test.

A) 12h Data

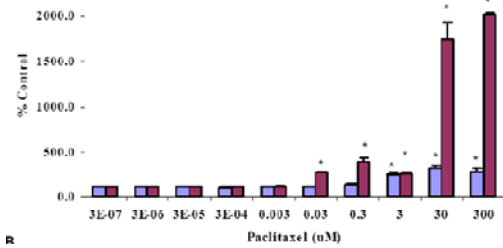

B) 24h Data

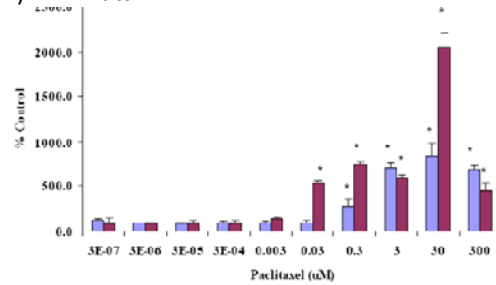

Supplement: NIHMS218356-supplement-1_si_001.pdf [file NIHMS218356-supplement-1_si_001.pdf]
